# Supplementary material for: Human papillomavirus E7 induces p63 expression to modulate DNA damage response
Source: PubMed Central journal article supplement (PMC5833683; doi:10.1038/s41419-017-0149-6), 2018-01-26
Supplement: 41419_2017_149_MOESM1_ESM.pdf [file 41419_2017_149_MOESM1_ESM.pdf]

## **SUPPLEMENTARY FIGURE LEGENDS**

**Supplementary Figure S1: CaSki cells express  $\Delta$ Np63, not TAp63 and E7-p63 regulatory axis does not involve microRNA-203** (a) Total RNA from CaSki cells, transfected with scrambled siRNA or E7-siRNA and harvested 48H after transfection. Total RNA was extracted and reversed by using random primers. SQ-PCR was used to assess transcript levels of TAp63 and  $\Delta$ Np63. 18S was used as housekeeping gene to normalize sample-to-sample variations. PCR using TAp63 plasmid or  $\Delta$ Np63 plasmid as template was used as positive control for each isoform-specific PCR. (scr: scrambled control siRNA, NTC: no template control) (b) miR-203 expression in CaSki cells following E7-depletion was analysed by qRT-PCR.

**Supplementary Figure S2: Loss of E7 induces cell cycle arrest** (a) CaSki cells were transiently transfected with siE7 and cell cycle was assessed at indicated time points by flow cytometry. (b) CaSki cells were transfected as indicated and collected after 5 days. Cell lysates from scr/siE7-transfected cells were analysed for the expression of the differentiation marker involucrin (*inv*) by qRT-PCR. 18S was used as housekeeping gene to normalize sample-to-sample variations. (c) G1/S arrest was induced in CaSki cells by aphidicolin (APH) treatment or by contact inhibition (CI). Cell cycle was analysed by flow cytometry. (d) A fraction of cells from (c) was used to quantitate G1/S/G2 populations by flow cytometry and results were plotted on a graph. (e) CaSki cells were transfected with siE7 and scrambled control siRNA in duplicates. 24 hours later one plate of cells from each duplicate was re-transfected with pcDNA3.1 empty vector and the other plate of cells with HAp63-pcDNA3.1 plasmid. Cells were collected 48 hours later and analysed for cell cycle profile.

**Supplementary Figure S3: Gamma irradiation does not induce the expression of TAp63 isoform.** CaSki cells were transfected with scrambled control siRNA or p63 siRNA, and exposed to 3.5Gy ionising radiation 48 hours after transfection. Total RNA was extracted from harvested cells 48H after  $\gamma$ IR. SQ-PCR was used to assess transcript levels of TAp63 and  $\Delta$ Np63. 18S was used as housekeeping gene to normalize sample-to-sample variations. PCR using TAp63 plasmid or  $\Delta$ Np63 plasmid was used as positive controls for each isoform-specific PCR. (scr: scrambled control siRNA)

**Supplementary Figure S4: p63 modulates DDR.** p63-expressing and p63-depleted CaSki cells on cover-slips were fixed at indicated times following  $\gamma$ IR. Phosphorylation of p53BP1 (**a**) and H2AX (**b**) was analysed by immunofluorescence. Blue: DAPI, Green: pp53BP1 (a)/  $\gamma$ H2AX (b). (Bar: 5  $\mu$ m) (**c**) Q-PCR analysis showing changes in the expression RAD51AP, RPA1, ATM and BRCA2, 48H after p63 depletion in CaSki cells.

**Supplementary Figure S5: Loss of p63 induces DDR.** CaSki cells were transfected with p63 siRNA and re-transfected 6 days after the initial transfection, to maintain transfection efficiency. Lysates from indicated time points were run on acrylamide gels to analyse  $\gamma$ H2AX levels, in order to assess the impact of long-term p63-depletion on the response of cells to intrinsic DNA damage.
